# Supplementary material
Source: PubMed Central journal article supplement (PMC3567638)
Supplement: supp_M112.405654_jbc.M112.405654-1.pdf [file supp_M112.405654_jbc.M112.405654-1.pdf]

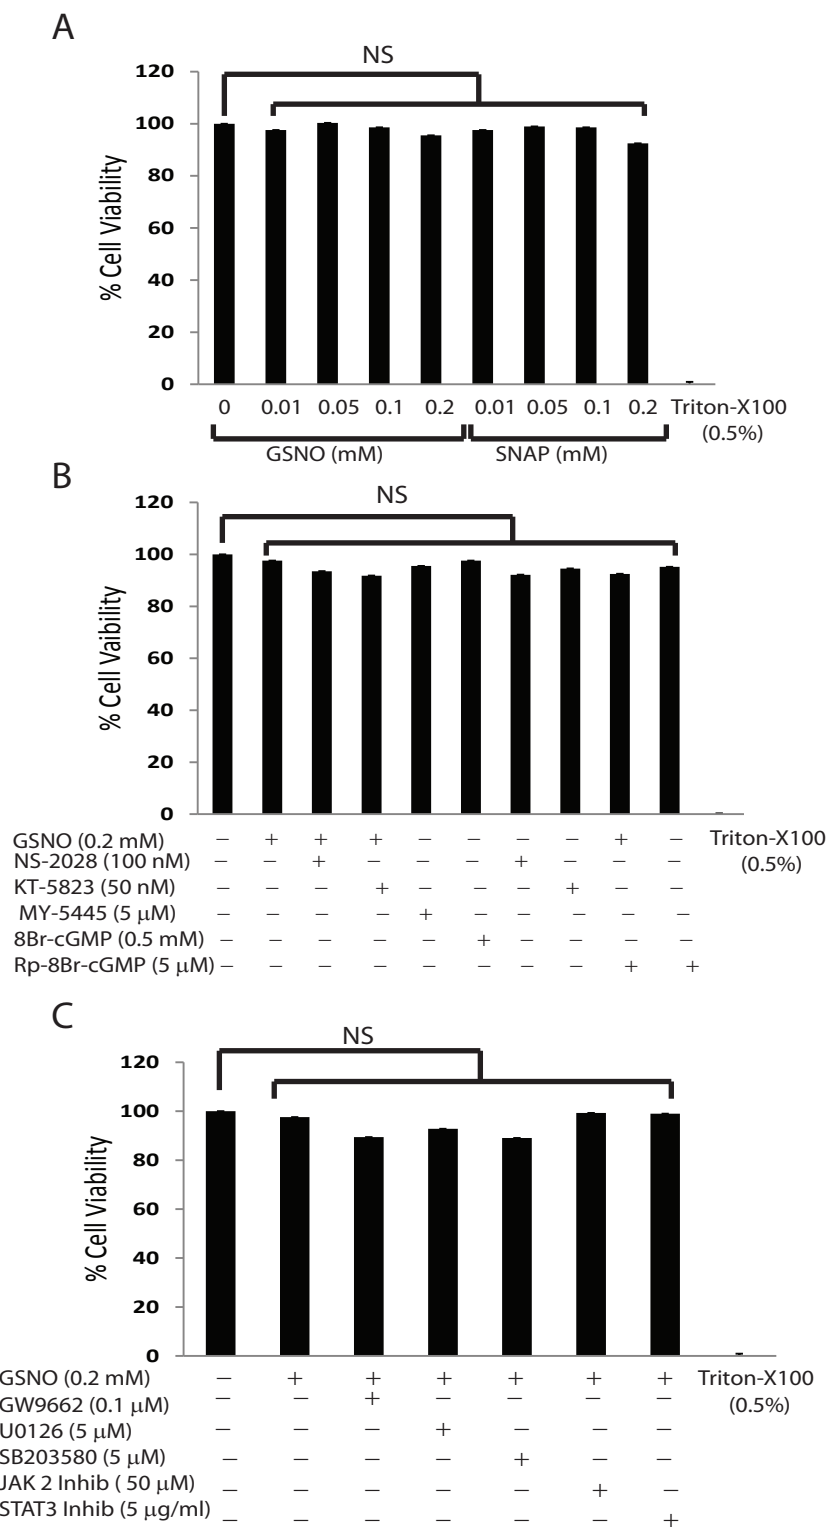

**Fig. S1. Cell viability of astrocytes treated with various pharmacological agents.** Toxicity of various pharmacological agents used in the study was measured by cell viability analysis. Cortical astrocytes were plated in 6-well cell culture plates as detailed in Figure 1 legend. Cell viability was determined with regard to the untreated cell control, which was set to 100% viability using LDH release assay. A lysis control where the cells were treated with 0.5% triton X-100 was set to 0% viability, which was found to be sufficient to induce 100% cell death. Composite mean  $\pm$  SEM of three experiments depicts % cell viability in treated astrocytes with GSNO or SNAP (A), GSNO plus pharmacological inhibitors or agonist of NO signaling effector sGC/cGMP/PKG pathway (B), and GSNO plus inhibitors of PPAR- $\gamma$  (GW9662), MEK (U0126), p38 MAPK (SB203580), JAK2 and STAT3 (C) for 48 h. Statistical significance as indicated NS, not significant.
